# Supplementary material for: AhR is negatively regulated by miR-203 in response to TCDD or BaP treatment
Source: Royal Society of Chemistry journal article supplement (doi:10.1039/c3tx50083g), 2013-10-18
Supplement: c3tx50083g.doc [file c3tx50083g.doc]

**Supplementary Data**

**Supplementary Table 1** The primer sequences for constructing the wild type and mutant 3’UTR

| Primers | Sequences |
| --- | --- |
| AhR-UTR wild type F | GGCGGCAGATCTATGAACAGCAGCAGCGCC |
| AhR -UTR wild type R | GGCGGCGTCGACTTACAGGAATCCACTGG |
| AhR -MRE1 F | GGCGGCGAATTCGCAAGTTCACATGGAGGCA |
| AhR -MRE1 R | GGCGGCGGGCCCAAGGAGGAAAGCACTGAGATTA |
| AhR -MRE2 F | GGCGGCGAATTCCTATGTGCCTTATGTT |
| AhR -MRE2 R | GGCGGCGGGCCCTAAAGTTGGTAGGGTGAT |
| AhR -MRE3 F | GGCGGCGAATTCTTGTTGGGGCTTTACATACT |
| AhR -MRE3 R | GGCGGCGGGCCCCCTGGTACAGGAAAAGACTAA |
| AhR UTR mut F2 | AAGCAAAGCACCCAACCAAATGTGTATAAAT |
| AhR UTR mut R2 | ATTTATACACATTTGGTTGGGTGCTTTGCTT |
